# Supplementary material
Source: PubMed Central journal article supplement (PMC3874934)

**A**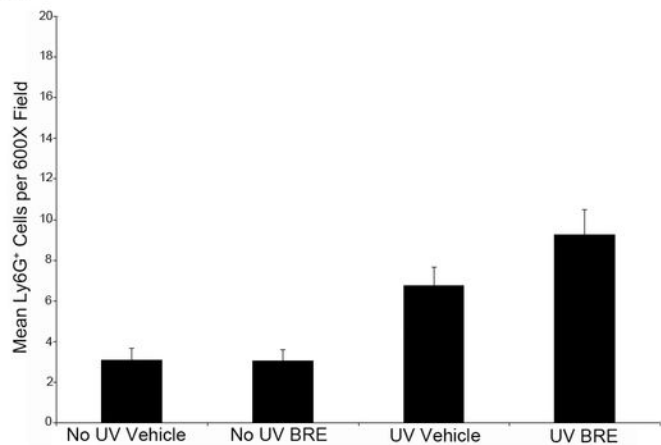**B**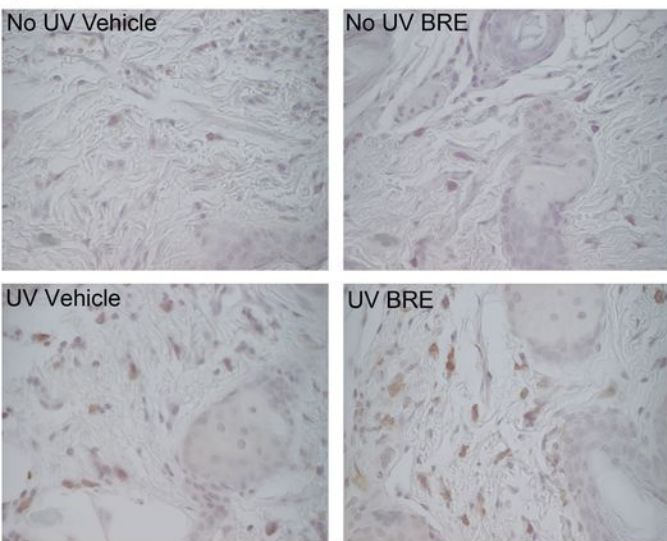

Supplement: NIHMS523759-supplement-Suppl_Figure.pdf [file NIHMS523759-supplement-Suppl_Figure.pdf]
